# Supplementary material for: Flexible and robust hybrid paper with a large piezoelectric coefficient
Source: Royal Society of Chemistry journal article supplement (doi:10.1039/c5tc03775a), 2016-01-01
Supplement: c5tc03775a1.pdf [file c5tc03775a1.pdf]

# Supporting Information for

## Flexible and Robust Hybrid Paper with Large Piezoelectric Coefficient

*Suresha K. Mahadeva<sup>1\*</sup>, Konrad Walus<sup>1</sup>, and Boris Stoeber<sup>1, 2</sup>*

<sup>1</sup>Department of Electrical and Computer Engineering, The University of British Columbia

2332 Main Mall, Vancouver, BC V6T 1Z4, Canada

<sup>2</sup>Department of Mechanical Engineering, The University of British Columbia

2054-6250 Applied Science Lane, Vancouver, BC V6T 1Z4, Canada

\*Email: [sure1977@mail.ubc.ca](mailto:sure1977@mail.ubc.ca), [suresha\\_km@hotmail.com](mailto:suresha_km@hotmail.com)

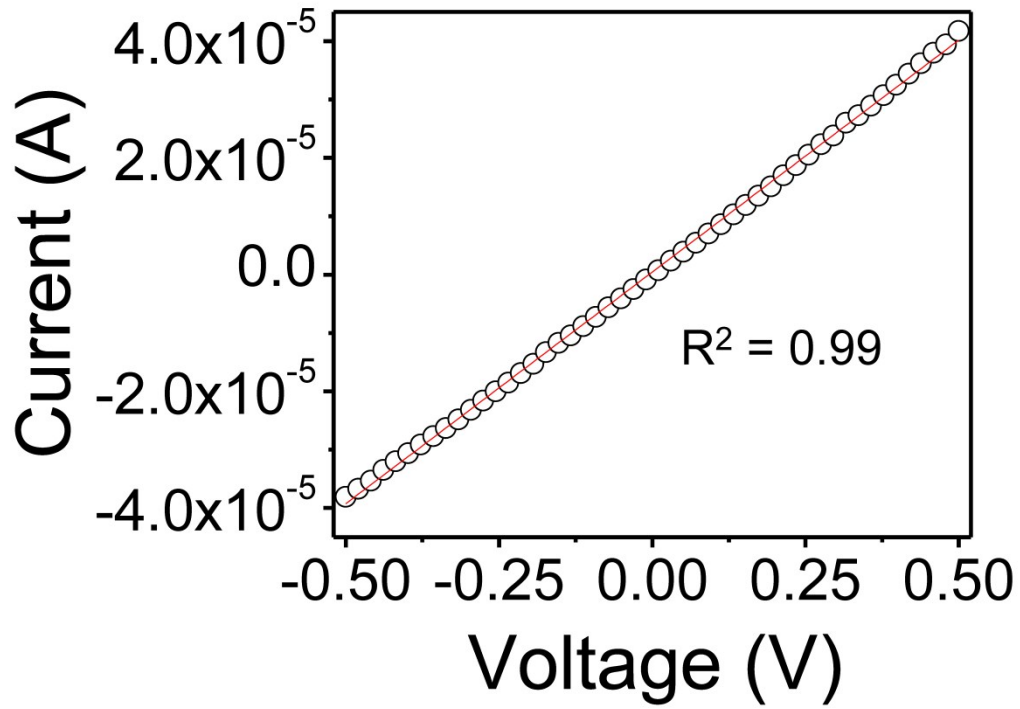

Figure S1. Current-Voltage (I-V) sweep curve of the piezoelectric paper, the voltage  $V$  was scanned between -0.5 V and +0.5 V and the resulting  $dc$  current  $I$  was measured using a source meter (Keithley 2635A). The electrical conductivity

$$\sigma_s = \frac{\Delta I}{\Delta V} \frac{L}{A}$$

was then calculated using the slope of the current versus voltage curve  $\Delta I/\Delta V$ , the thickness  $L = 0.011$  cm, and the area  $A = 1$  cm<sup>2</sup> of the sample, to yield  $\sigma_s = 9.19 \times 10^{-7}$  S/cm.

**(1) Scissor cut Piezoelectric Paper (2.5 cm × 2.5 cm)**

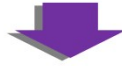

**(2) Scissor cut Laminating Pouches (4 cm × 4 cm)**

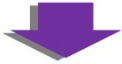

**(3) Deposit Silver Electrode on Laminating Pouches Using Conductive Ink Dispenser (2 cm × 2 cm)**

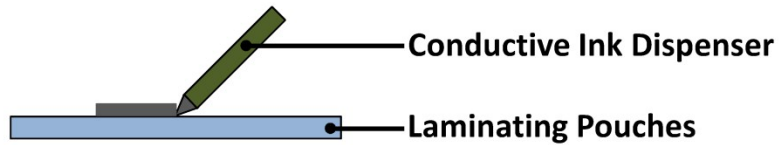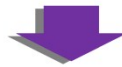

**(4) Sandwiching Piezoelectric Paper between Electroded Laminating Pouches**

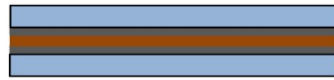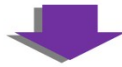

**(5) Hot Lamination Using Office Laminator and wiring**

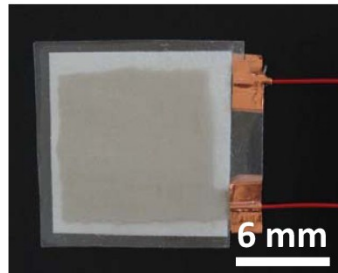

Figure S2. Step-by-step process showing a novel process for fabricating paper based accelerometer.

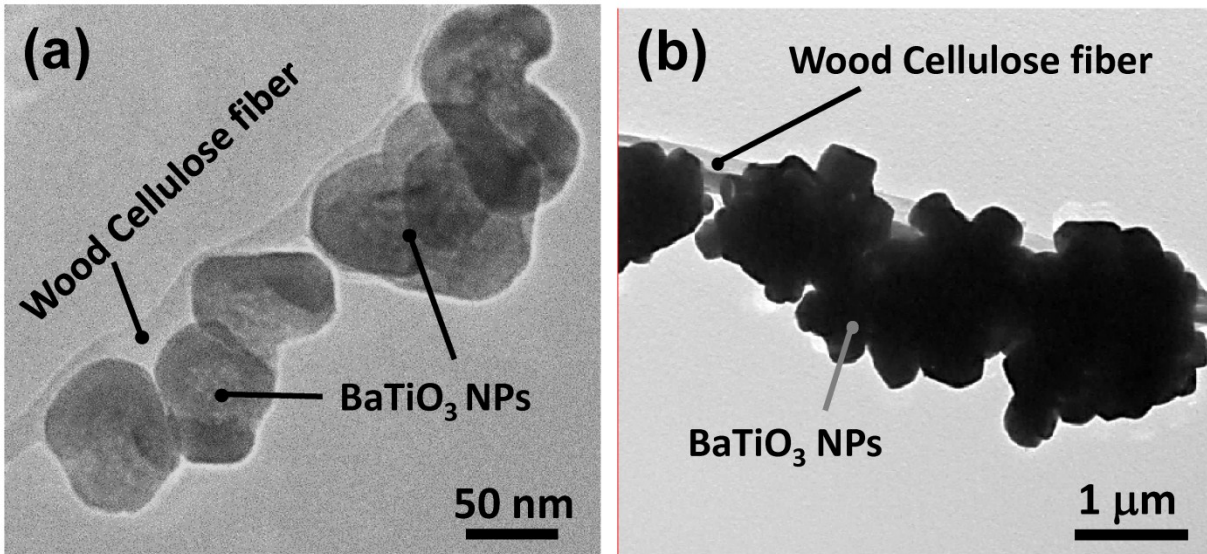

Figure S3: Compared TEM images of BaTiO<sub>3</sub> functionalized wood fiber before (a) and after (b) activating in CMC suspension, wood fibers appears larger than that of their counterparts due to coverage of CMC.

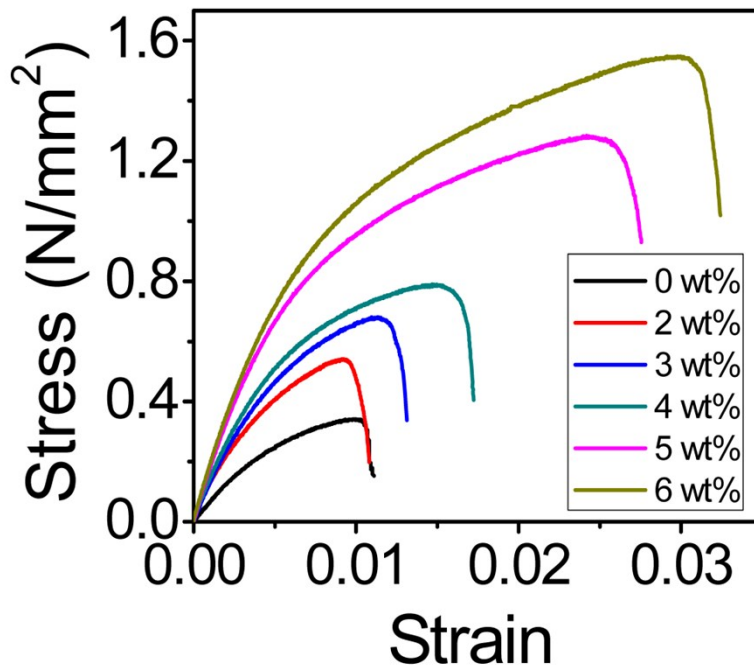

Figure S4. Stress-strain curves of hybrid paper as a function of CMC concentration.

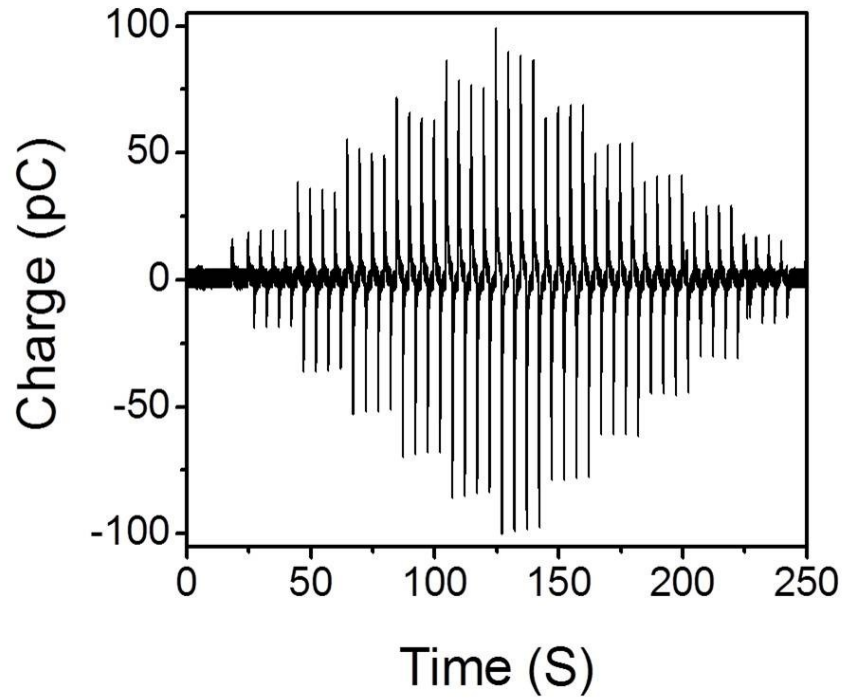

Figure S5. Piezoelectric response of hybrid paper aged for 14 months.

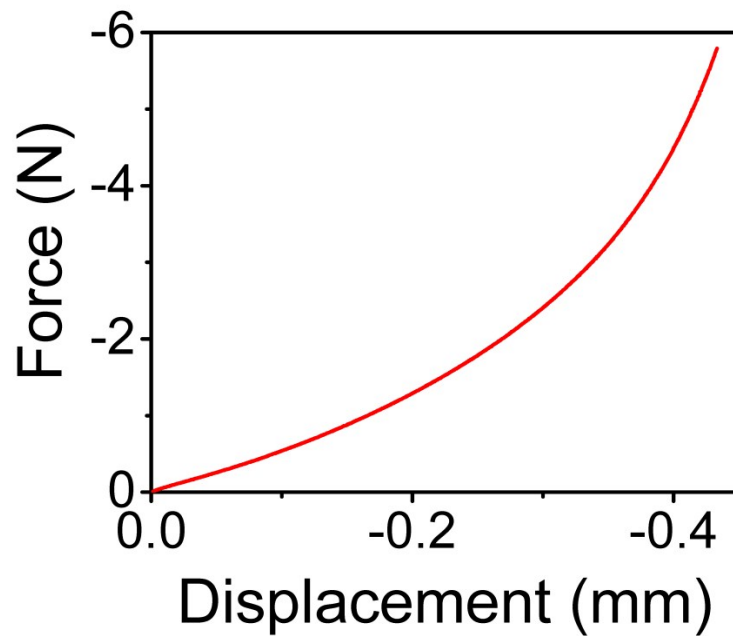

Figure S6. Force-displacement curve of paper laminate subjected to compression load using *Bose Electro force*.

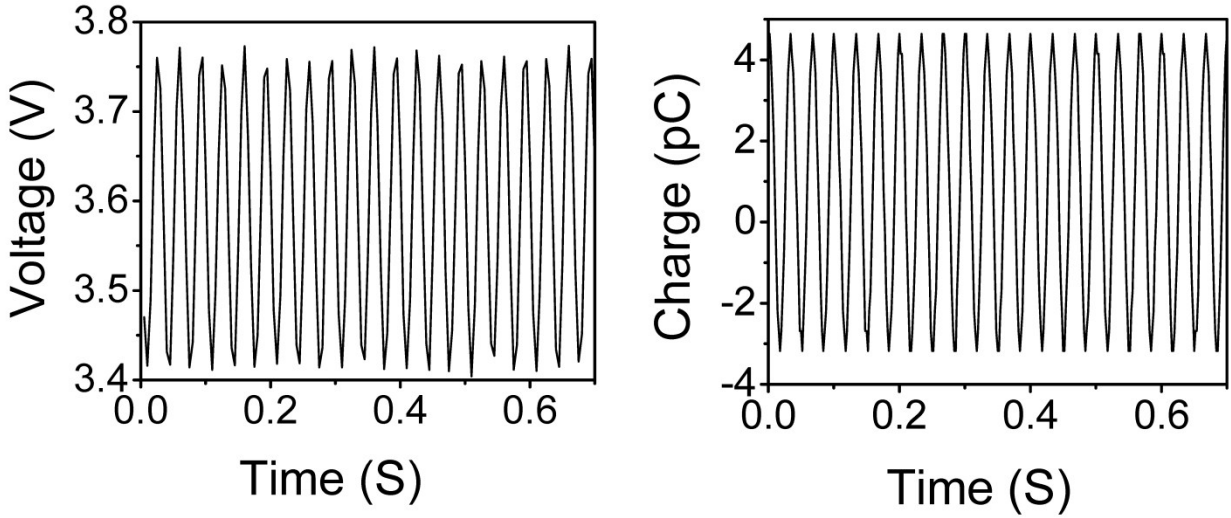

Figure S7. Compared output signal measured from commercial reference accelerometer; ADXL203 EB by Analog Devices (left), and paper accelerometer (right) at 30 Hz and 0.18 g acceleration amplitude. Note that output signal recorded from the paper accelerometer is similar and matches with a reference accelerometer.

## Estimated Cost for Preparing $\phi$ 11 cm Hybrid Piezoelectric Paper

### Material Cost

| <b>Material</b>        | <b>Quantity<br/>Required</b> | <b>Rate</b> | <b>Cost</b> |
|------------------------|------------------------------|-------------|-------------|
| Pulp                   | 2 g                          | \$1/kg      | \$0.002     |
| NaCl                   | 9 g                          | \$10.5/kg   | \$0.095     |
| PSS                    | 1 g                          | \$51.4/100g | \$0.51      |
| PDDA                   | 2 g                          | \$41.7/kg   | \$0.08      |
| BaTiO <sub>3</sub> NPs | 2.52 g                       | \$263/kg    | \$0.66      |
| NaCMC                  | 0.5 g                        | \$111/kg    | \$0.056     |
| Total Material Cost    |                              |             | \$1.4       |

NaCl- sodium chloride, PSS- poly(sodium 4-styrenesulfonate), PDDA- poly(diallyldimethylammonium chloride), NaCMC- sodium carboxymethylcellulose, BaTiO<sub>3</sub> NPs- barium titanate nanoparticles

### Electric Charges for Poling

**Electric energy required for Poling**

$$= \text{Oven} + \text{Voltage source} = 9.6 \text{ kWh} + 0.12 \text{ kWh} = 9.72 \text{ kWh}$$

**Electric tariff = \$0.59/h**

$$\text{Electric Charges for Poling} = 9.72 \times \$0.59 = \$5.74$$

$$\text{Cost for Preparing } \phi 11 \text{ cm Hybrid Piezoelectric Paper} = \$1.4 + \$5.74 = \$7.14$$

## Paper Accelerometer Model

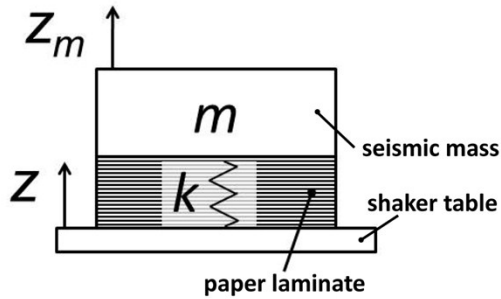

$Z$ , and  $Z_m \rightarrow$  displacement of shaker table and seismic mass respectively

Paper accelerometer configuration

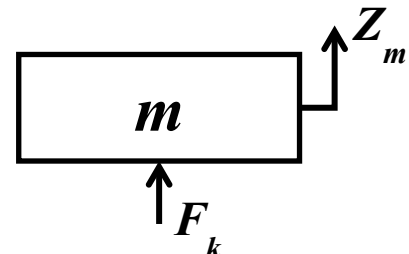

Free-body diagram of seismic mass

$$a = \ddot{Z} = -\omega^2 Z$$

$$F_k = m\ddot{Z}_m$$

$$F_k = k(Z - Z_m)$$

harmonics:

$$Z_m = Z_m \omega_s \omega_t$$

$$\ddot{Z}_m = -\omega^2 Z_m \cos \omega t = -\omega^2 Z_m$$

$$F_m = m\ddot{Z}_m = -m\omega^2 Z_m = k(Z - Z_m)$$

$$Z_m = \frac{k}{k - m\omega^2} Z = \frac{Z}{1 - (\omega/\omega_0)^2} \quad \text{with } \omega_0 = \sqrt{k/m}$$

$$Q = D_3 A_3 = d_{33} \underset{F_3 = F_m}{\overset{A_3 \sigma_3}{\omega}} = d_{33} m (-\omega^2) Z_m$$

$$Q = \frac{d_{33} m}{1 - \left(\frac{\omega}{\omega_0}\right)^2} (-\omega^2) Z = \frac{d_{33} m}{1 - \left(\frac{\omega}{\omega_0}\right)^2} a$$

$$\frac{Q}{a} = \frac{d_{33} m}{1 - \left(\frac{\omega}{\omega_0}\right)^2}$$

$$f_0 = \frac{1}{2\pi} \sqrt{k/m}$$
